# Supplementary material for: Exploring the electrocatalytic application of two-dimensional samarium molybdate (γ-Sm3(MoO4)3) nanoplatelets for the selective sensing of the organophosphate insecticide oxyparathion
Source: Royal Society of Chemistry journal article supplement (doi:10.1039/c9nj06015d), 2020-01-01
Supplement: c9nj06015d1.pdf [file c9nj06015d1.pdf]

## Supplementary Information

### **Exploring the Electrocatalytic application of Two-Dimensional Samarium Molybdate ( $\gamma$ - $\text{Sm}_3(\text{MoO}_4)_3$ ) Nanoplatelets for Selective Sensing of Organophosphate Insecticide Oxyparathion**

**Jeyaraj Vinoth Kumar<sup>a</sup>, Bhuvanenthiran Mutharani<sup>b</sup>, Shen-Ming Chen<sup>b\*</sup>, Ramachandran Rajakumaran<sup>b</sup>, and Erumaipatty Rajagounder Nagarajan<sup>a\*</sup>**

<sup>a</sup>Department of Chemistry, Nanomaterials Laboratory, International Research Center, Kalasalingam Academy of Research and Education, Krishnankoil 626 126, Tamil Nadu, India.

<sup>b</sup>Electroanalysis and Bioelectrochemistry Lab, Department of Chemical Engineering and Biotechnology, National Taipei University of Technology, No. 1, Section 3, Chung-Hsiao East Road, Taipei 106, Taiwan, ROC.

#### **Corresponding Authors:**

\*E-mail: [smchen78@ms15.hinet.net](mailto:smchen78@ms15.hinet.net) (S-M Chen)

Phone: +886-2270-17147. Fax: +886-2270-25238.

\*E-mail: [nagarajanklu@gmail.com](mailto:nagarajanklu@gmail.com) (E.R.N)

Phone: +91 9976204859

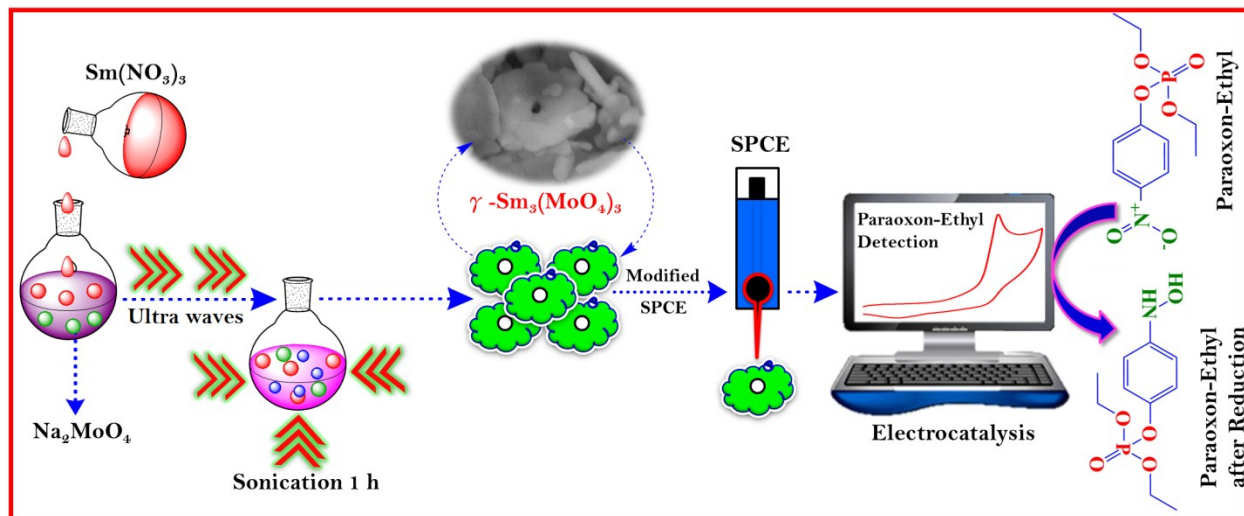

**Scheme. S1.** Schematic illustration of the synthetic procedure for the synthesis of SmM NPs and its electrochemical applications.

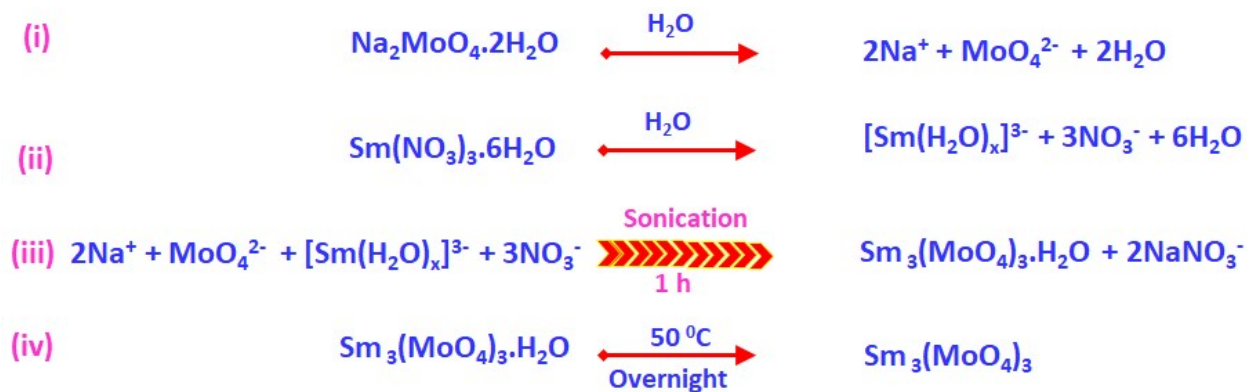

**Scheme S2.** The formation mechanism of  $\text{Sm}_3(\text{MoO}_4)_3$  NPs.

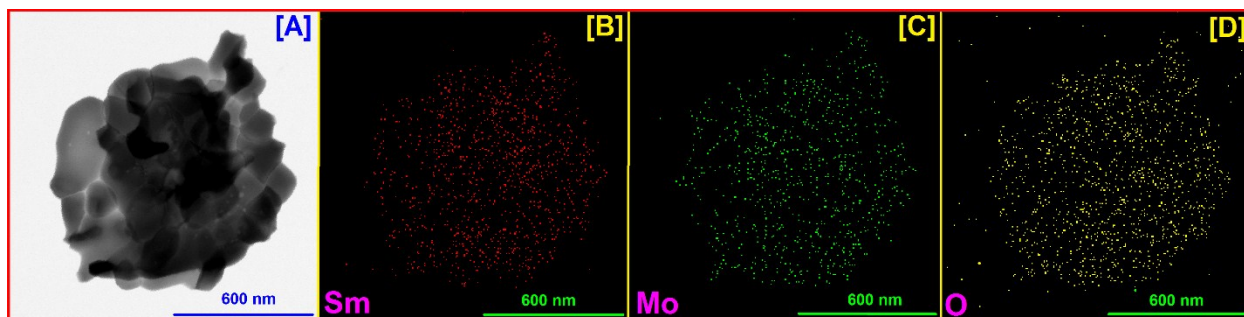

**Fig. S1.** (A)Elemental mapping analysis of SmM NPs; Sm (B), Mo (C) and O (D).

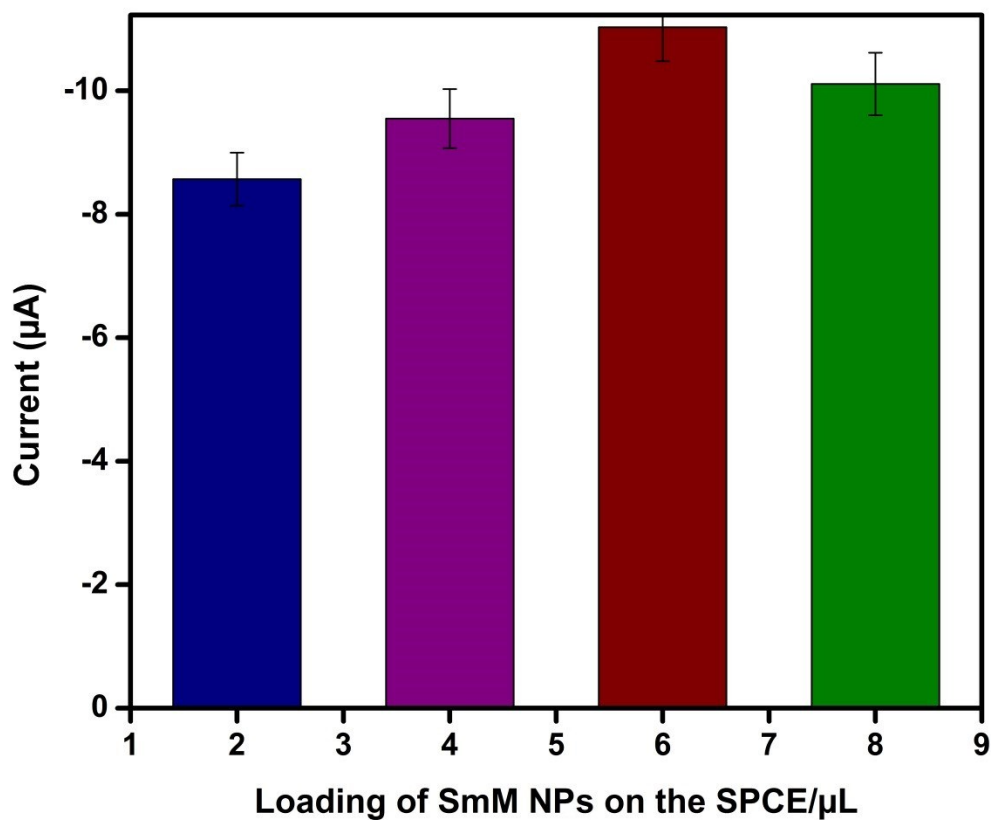

**Fig. S2.** The calibration plot for the loading of different amount of SmM NPs suspension on the SPCE towards OP detection.

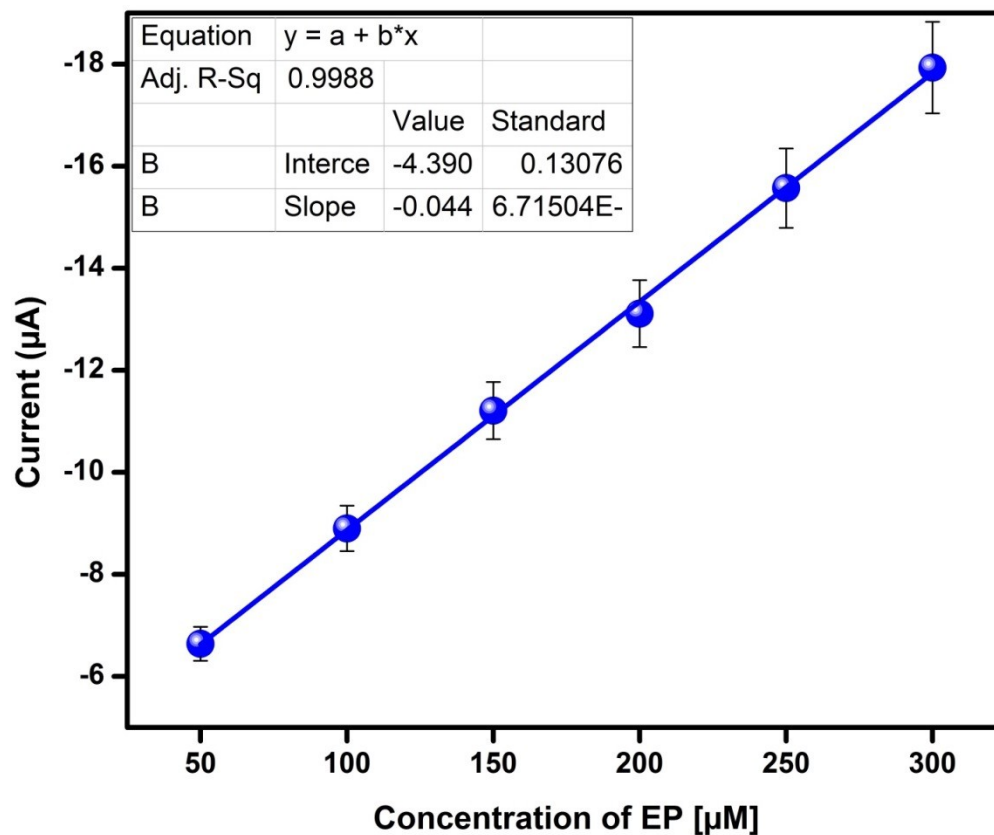

Fig. S3. The linear plot for concentration of EP vs. cathodic peak current.

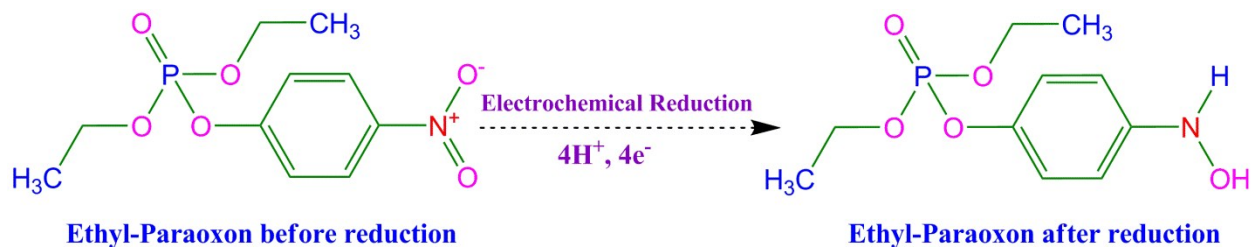

Scheme. S3. Possible electrochemical reduction mechanisms of EP on the SmM NPs/SPCE.

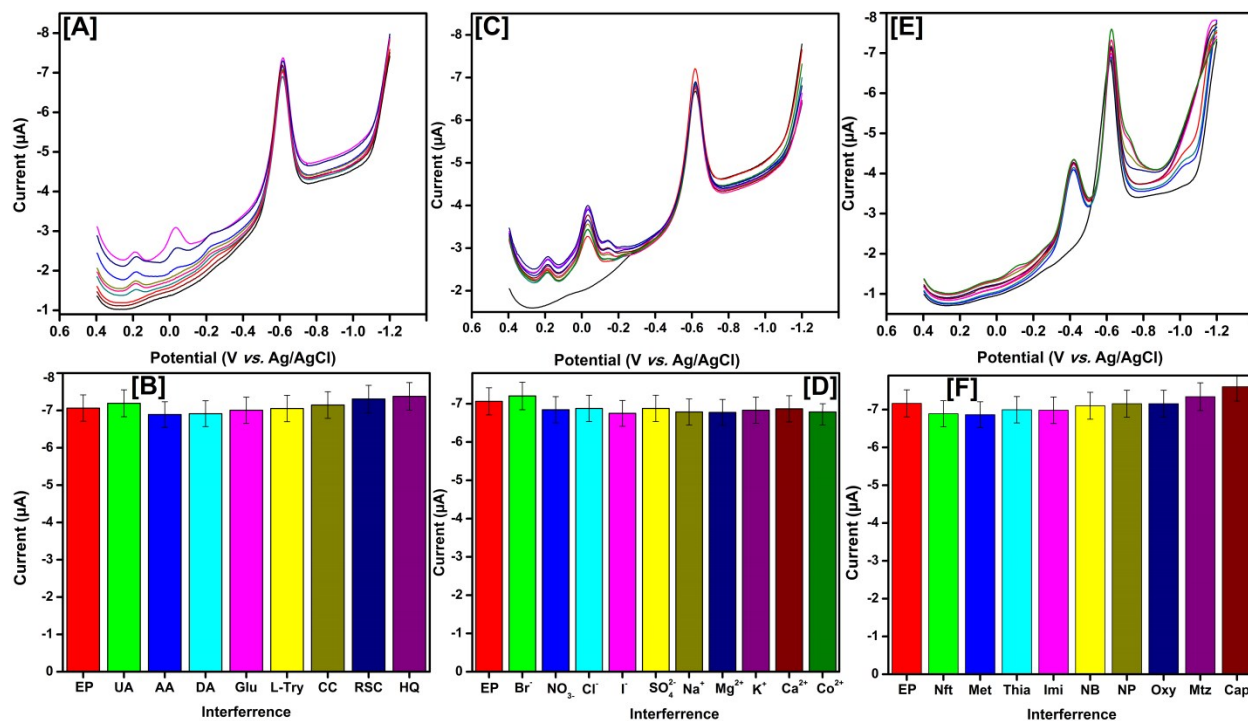

**Fig. S4.** The DPV responses of OP reduction in the occurrence of potentially co-interfering species (A) biological compounds: UA, AA, DA, Glu, L-Try, CC, RSC and HQ (Calibration plot B). (C) Inorganic species:  $\text{Co}^{2+}$ ,  $\text{Ca}^{2+}$ ,  $\text{K}^+$ ,  $\text{Mg}^{2+}$ ,  $\text{Na}^+$ ,  $\text{SO}_4^{2-}$ ,  $\text{I}^-$ ,  $\text{Cl}^-$ ,  $\text{NO}_3^-$ , and  $\text{Br}^-$  (Calibration plot D). (E) Nitro group containing pollutants, pesticides and drugs: Nft, Met, Thia, Imi, NB, NP, Oxy, Mtz and Cap (Calibration plot F).

**Table. S1.** Real sample analysis

| Samples   | Added ( $\mu\text{M}$ ) | Found ( $\mu\text{M}$ ) | Recovery (%) |
|-----------|-------------------------|-------------------------|--------------|
| Soil      | 0.00                    | 0.00                    | -            |
|           | 0.1                     | 0.089                   | 89.0         |
|           | 0.5                     | 0.42                    | 84.0         |
| Tab water | 0.00                    | 0.00                    | -            |
|           | 0.1                     | 0.101                   | 101.0        |
|           | 0.5                     | 0.498                   | 99.6         |

|            |      |       |      |
|------------|------|-------|------|
| Lake water | 0.00 | 0.00  | -    |
|            | 0.1  | 0.096 | 96.0 |
|            | 0.5  | 0.491 | 98.2 |

---
